# Supplementary material for: Emergence of bedaquiline resistance in a high tuberculosis burden country
Source: PubMed Central journal article supplement — Eur Respir J. 2022 Mar 24;59(3):2100621. doi: 10.1183/13993003.00621-2021 (PMC8943268; doi:10.1183/13993003.00621-2021), 2022-03-24
Supplement: erj-00621-2021.supplement_tableS1.pdf [file erj-00621-2021.supplement_tableS1.pdf]

| PatNo | cohort          | Days_BDQ | dataset         | OrigID | BorstelID | Accession number | coll_lineage_name | nijing_linea | Gender       | case | outcome     | outcome simple | Cavity   | HIV | Age | preDR/XDR | SNP_distance_follow-up | inactive_drugs | Bdq100 | Lsd500 | H300   | E400 | Z400 | Lfx250/Ml | Km1000 | Cm1000 | Eto250 | PAS4000 | Cs250   | Cf1000 | Imp_Am/5 | S1000  | Am:1000 | Dim:50 |    |    |    |    |
|-------|-----------------|----------|-----------------|--------|-----------|------------------|-------------------|--------------|--------------|------|-------------|----------------|----------|-----|-----|-----------|------------------------|----------------|--------|--------|--------|------|------|-----------|--------|--------|--------|---------|---------|--------|----------|--------|---------|--------|----|----|----|----|
| 1     | prior_BDQ       | -83      | table 2         | 6579   | CAR-28    | ERR4872280       | 4.2.1             | Ural         | not_Beijing  | M    | PTC-relapsa | cured          | POSITIVE | no  | neg | 41        | XDR                    | NA             | 1      | 8dq100 | Lsd500 | NA   | NA   | 2400      | NA     | NA     | Cm1000 | NA      | NA      | Cs250  | NA       | NA     | NA      | NA     | NA | NA |    |    |
| 2     | prior_after BDQ | -16      | table 2         | 5996   | CAR-78    | ERR4872337       | 2.2.1             | Beijing      | issian W144  | M    | PTC-failure | failure        | NEGATIVE | yes | neg | 34        | XDR                    | 3              | 2      | 8dq100 | Lsd600 | NA   | NA   | 2400      | NA     | NA     | Cm1000 | NA      | Ps4000  | Cs250  | NA       | NA     | NA      | NA     | NA | NA |    |    |
| 3     | prior_BDQ       | -15      | table 2         | 17691  | CAR-77    | ERR4872336       | 2.2.1             | Beijing      | CentralAsi   | F    | new_case    | cured          | POSITIVE | yes | neg | 38        | MDR+                   | NA             | 2      | 8dq100 | Lsd600 | NA   | H300 | E400      | 2400   | Lfx250 | NA     | NA      | Pro:250 | NA     | NA       | NA     | NA      | NA     | NA | NA |    |    |
| 4     | prior_BDQ       | -11      | table 2         | 13699  | CAR-29    | ERR4872283       | 4.2.1             | Ural         | not_Beijing  | M    | PTC-defaul  | cured          | POSITIVE | yes | neg | 36        | XDR                    | 0              | 2      | 8dq100 | Lsd500 | NA   | E400 | NA        | NA     | NA     | Cm1000 | NA      | NA      | NA     | Cs250    | NA     | NA      | NA     | NA | NA | NA |    |
| 5     | prior_BDQ       | -147     | follow-up       | 18104  | CAR-44    | ERR4872300       | 4.2.1             | Ural         | not_Beijing  | M    | PTC-defaul  | cured          | POSITIVE | yes | neg | 36        | XDR                    | 0              | 2      | 8dq100 | Lsd500 | NA   | E400 | NA        | NA     | NA     | Cm1000 | NA      | NA      | Cs250  | NA       | NA     | NA      | NA     | NA | NA |    |    |
| 6     | prior_BDQ       | -21      | table 2         | 10511  | CAR-23    | ERR4872275       | 4.2.1             | Ural         | not_Beijing  | M    | PTC-failure | failure        | NEGATIVE | yes | neg | 42        | XDR                    | NA             | 2      | 8dq100 | Lsd500 | H300 | NA   | NA        | NA     | Cm1000 | NA     | Ps4000  | Cs250   | NA     | Imp500   | A      | NA      | NA     | NA | NA |    |    |
| 7     | prior_BDQ       | -21      | table 2         | C2548  | CAR-86    | ERR4872341       | 2.2.1             | Beijing      | issian W144  | M    | new_case    | cured          | POSITIVE | yes | neg | 53        | pre-XDR                | 1              | 3      | 8dq100 | Lsd500 | NA   | NA   | 2400      | Lfx250 | H300   | NA     | NA      | NA      | NA     | Cs250    | NA     | NA      | NA     | NA | NA | NA |    |
| 8     | prior_BDQ       | -40      | table 2         | 11858  | CAR-6     | ERR4872328       | 2.2.1             | Beijing      | CentralAsi   | M    | PTC-failure | failure        | NEGATIVE | yes | neg | 35        | pre-XDR                | NA             | 2      | 8dq100 | Lsd500 | NA   | NA   | 2400      | NA     | NA     | Cm1000 | NA      | Ps4000  | Cs250  | NA       | NA     | NA      | NA     | NA | NA | NA |    |
| 9     | prior_BDQ       | -7       | table 2         | 8840   | CAR-59    | ERR4872316       | 4.2.1             | Ural         | not_Beijing  | F    | new_case    | cured          | POSITIVE | no  | neg | 36        | XDR                    | NA             | 2      | 8dq100 | Lsd500 | NA   | E400 | 2400      | Lfx250 | NA     | NA     | Cm1000  | Eto250  | NA     | NA       | NA     | NA      | NA     | NA | NA |    |    |
| 10    | prior_BDQ       | -21      | follow-up       | 15261  | CAR-20    | ERR4872272       | 4.2.1             | Ural         | not_Beijing  | M    | PTC-failure | cured          | POSITIVE | no  | neg | 25        | XDR                    | 0              | 4      | 8dq100 | Lsd600 | NA   | NA   | 2400      | Mfx400 | NA     | Cm1000 | NA      | NA      | Cs250  | NA       | Imp500 | A       | NA     | NA | NA | NA |    |
| 11    | prior_BDQ       | -212     | table 2         | 16933  | CAR-42    | ERR4872298       | 4.2.1             | Ural         | not_Beijing  | M    | PTC-failure | cured          | POSITIVE | no  | neg | 25        | XDR                    | 0              | 4      | 8dq100 | Lsd600 | NA   | NA   | 2400      | Mfx400 | NA     | Cm1000 | NA      | NA      | Cs250  | NA       | Imp500 | A       | NA     | NA | NA | NA |    |
| 12    | prior_BDQ       | -10      | follow-up       | 14591  | CAR-61    | ERR4872319       | 2.2.1             | Beijing      | issian W144  | M    | PTC-defaul  | failure        | NEGATIVE | yes | neg | 36        | pre-XDR                | 1              | 2      | 8dq100 | Lsd500 | NA   | NA   | 2400      | NA     | NA     | Cm1000 | NA      | NA      | Cs250  | NA       | NA     | NA      | NA     | NA | NA | NA |    |
| 13    | prior_BDQ       | -15      | table 2         | 20592  | CAR-46    | ERR4872302       | 4.2.1             | Ural         | not_Beijing  | F    | new_case    | cured          | POSITIVE | yes | neg | 29        | pre-XDR                | NA             | 2      | 8dq100 | NA     | H300 | E400 | 2400      | Lfx250 | NA     | NA     | Pro:250 | NA      | NA     | NA       | NA     | NA      | NA     | NA | NA |    |    |
| 14    | prior_BDQ       | -55      | table 2         | 6159   | CAR-5     | ERR4872317       | 2.2.1             | Beijing      | CentralAsi   | M    | PTC-defaul  | cured          | POSITIVE | yes | neg | 41        | XDR                    | 193            | 2      | 8dq100 | Lsd500 | NA   | NA   | 2400      | NA     | NA     | Cm1000 | NA      | Ps4000  | Cs250  | NA       | NA     | NA      | NA     | NA | NA | NA |    |
| 15    | prior_BDQ       | -68      | follow-up       | 1267   | CAR-73    | ERR4872332       | 2.2.1             | Beijing      | issian W144  | M    | PTC-defaul  | cured          | POSITIVE | yes | neg | 41        | XDR                    | 193            | 2      | 8dq100 | Lsd500 | NA   | NA   | 2400      | NA     | NA     | Cm1000 | NA      | Ps4000  | Cs250  | NA       | NA     | NA      | NA     | NA | NA | NA |    |
| 16    | prior_BDQ       | -68      | outcome_missing | 10244  | CAR-82    | ERR4872342       | 2.2.1             | Beijing      | CentralAsi   | M    | PTC-relapsa | lost           | NA       | yes | neg | 48        | MDR+                   | NA             | 2      | 8dq100 | NA     | NA   | NA   | 2400      | NA     | NA     | NA     | Ps4000  | Cs250   | NA     | NA       | NA     | NA      | NA     | NA | NA |    |    |
| 17    | prior_BDQ       | -17      | follow-up       | 14538  | CAR-70    | ERR4872329       | 4.2.1             | Ural         | not_Beijing  | F    | PTC-failure | lost           | NA       | yes | neg | 35        | XDR                    | 0              | 0      | 8dq100 | Lsd500 | NA   | NA   | 2400      | NA     | NA     | Cm1000 | NA      | NA      | Cs250  | NA       | NA     | NA      | NA     | NA | NA | NA |    |
| 18    | prior_BDQ       | -10      | follow-up       | 15530  | CAR-54    | ERR4872311       | 4.2.1             | Ural         | not_Beijing  | F    | PTC-failure | lost           | NA       | yes | neg | 35        | XDR                    | 0              | 0      | 8dq100 | Lsd500 | NA   | NA   | 2400      | NA     | NA     | Cm1000 | NA      | NA      | Cs250  | NA       | NA     | NA      | NA     | NA | NA | NA |    |
| 19    | prior_BDQ       | -53      | only_follow-up  | 1658   | CAR-76    | ERR4872335       | 2.2.1             | Beijing      | CentralAsi   | M    | PTC-failure | failure        | NEGATIVE | no  | neg | 43        | pre-XDR                | NA             | 1      | 8dq100 | NA     | NA   | NA   | 2400      | Mfx400 | NA     | NA     | NA      | Cs250   | NA     | Imp500   | A      | Am:1000 | NA     | NA | NA | NA |    |
| 20    | prior_BDQ       | -12      | table 2         | 18762  | CAR-47    | ERR4872303       | 2.2.1             | Beijing      | issian W144  | F    | PTC-failure | failure        | NEGATIVE | yes | neg | 30        | XDR                    | NA             | 4      | 8dq100 | Lsd500 | NA   | E400 | 2400      | NA     | NA     | NA     | Ps4000  | Cs250   | NA     | Imp500   | A      | NA      | NA     | NA | NA |    |    |
| 21    | prior_BDQ       | -42      | table 2         | 1311   | CAR-94    | ERR4872355       | 2.2.1             | Beijing      | issian W144  | M    | new_case    | cured          | POSITIVE | no  | neg | 54        | pre-XDR                | NA             | 1      | 8dq100 | Lsd600 | NA   | NA   | 2400      | Lfx250 | NA     | NA     | NA      | Cs250   | NA     | NA       | NA     | NA      | NA     | NA | NA | NA |    |
| 22    | prior_BDQ       | -356     | only_follow-up  | 1218   | CAR-10    | ERR4872349       | 4.2.1             | Ural         | not_Beijing  | M    | PTC-failure | failure        | NEGATIVE | yes | neg | 42        | XDR                    | NA             | 1      | 8dq100 | Lsd500 | NA   | NA   | 2400      | NA     | NA     | NA     | NA      | Cs250   | NA     | Imp500   | A      | NA      | NA     | NA | NA | NA |    |
| 23    | prior_BDQ       | -12      | follow-up       | 13626  | CAR-9     | ERR4872357       | 2.2.1             | Beijing      | rai Asia out | M    | new_case    | cured          | POSITIVE | yes | neg | 41        | MDR+                   | 2              | 1      | 8dq100 | NA     | H200 | NA   | 2400      | Lfx250 | Km1000 | NA     | NA      | NA      | Cf100  | NA       | NA     | NA      | NA     | NA | NA | NA |    |
| 24    | prior_BDQ       | -74      | table 2         | 14764  | CAR-68    | ERR4872326       | 2.2.1             | Beijing      | rai Asia out | M    | new_case    | cured          | POSITIVE | yes | neg | 41        | MDR+                   | 2              | 1      | 8dq100 | NA     | H200 | NA   | 2400      | Lfx250 | Km1000 | NA     | NA      | NA      | Cf100  | NA       | NA     | NA      | NA     | NA | NA | NA | NA |
| 25    | prior_BDQ       | -8       | table 2         | 11055  | CAR-39    | ERR4872294       | 4.2.1             | Ural         | not_Beijing  | M    | new_case    | cured          | POSITIVE | yes | neg | 50        | XDR                    | NA             | 1      | 8dq100 | Lsd600 | NA   | NA   | 2400      | NA     | NA     | Cm1000 | Eto250  | NA      | NA     | Cs250    | NA     | NA      | NA     | NA | NA | NA | NA |
| 26    | prior_BDQ       | -8       | table 2         | 22164  | CAR-48    | ERR4872304       | 2.2.1             | Beijing      | CentralAsi   | M    | new_case    | cured          | POSITIVE | yes | neg | 34        | MDR+                   | NA             | 1      | 8dq100 | NA     | H300 | NA   | 2500      | Lfx250 | Km1000 | NA     | NA      | NA      | NA     | Cs250    | NA     | NA      | NA     | NA | NA | NA | NA |
| 27    | prior_BDQ       | -24      | table 2         | 9145   | CAR-21    | ERR4872340       | 2.2.1             | Beijing      | CentralAsi   | M    | PTC-failure | lost           | NA       | yes | neg | 42        | MDR+                   | 1              | 1      | 8dq100 | Lsd500 | NA   | NA   | 2400      | NA     | NA     | Cm1000 | NA      | NA      | Cs250  | NA       | Imp500 | A       | NA     | NA | NA | NA |    |
| 28    | prior_BDQ       | -90      | outcome_missing | 6714   | CAR-19    | ERR4872270       | 2.2.1             | Beijing      | rai Asia out | M    | new_case    | lost           | NA       | yes | neg | 35        | MDR+                   | NA             | 0      | 8dq100 | Lsd500 | NA   | NA   | NA        | Lfx250 | NA     | Cm1000 | NA      | NA      | Cs250  | NA       | NA     | NA      | NA     | NA | NA | NA |    |
| 29    | prior_BDQ       | -10      | table 2         | 13880  | CAR-81    | ERR4872341       | 4.2.1             | Ural         | not_Beijing  | M    | PTC-relapsa | cured          | POSITIVE | yes | neg | 47        | pre-XDR                | 0              | 0      | 8dq100 | NA     | NA   | NA   | 2400      | Lfx250 | NA     | Cm1000 | NA      | NA      | Cs250  | NA       | NA     | NA      | NA     | NA | NA | NA | NA |
| 30    | prior_BDQ       | -46      | follow-up       | 16322  | CAR-7     | ERR4872342       | 4.2.1             | Ural         | not_Beijing  | M    | PTC-relapsa | cured          | POSITIVE | yes | neg | 43        | MDR+                   | NA             | 1      | 8dq100 | Lsd500 | NA   | NA   | 2400      | Mfx400 | NA     | NA     | Ps4000  | Cs250   | NA     | NA       | NA     | NA      | NA     | NA | NA | NA |    |
| 31    | prior_BDQ       | -27      | table 2         | 60     | CAR-291   | ERR4872281       | 2.2.1             | Beijing      | CentralAsi   | M    | PTC-defaul  | cured          | POSITIVE | yes | neg | 32        | pre-XDR                | 0              | 1      | 8dq100 | Lsd500 | NA   | NA   | 2400      | Lfx250 | NA     | NA     | Ps4000  | Cs250   | NA     | Imp500   | A      | NA      | NA     | NA | NA | NA |    |
| 32    | prior_BDQ       | -23      | follow-up       | 1805   | CAR-15    | ERR4872266       | 2.2.1             | Beijing      | CentralAsi   | M    | PTC-defaul  | cured          | POSITIVE | yes | neg | 32        | pre-XDR                | 0              | 1      | 8dq100 | Lsd500 | NA   | NA   | 2400      | Lfx250 | NA     | NA     | Ps4000  | Cs250   | NA     | Imp500   | A      | NA      | NA     | NA | NA | NA |    |
| 33    | prior_BDQ       | -36      | table 2         | 15173  | CAR-21    | ERR4872273       | 4.2.1             | Ural         | not_Beijing  | M    | PTC-failure | failure        | NEGATIVE | yes | neg | 45        | MDR+                   | NA             | 4      | 8dq100 | Lsd500 | NA   | H300 | E400      | 2500   | Lfx250 | NA     | NA      | Pro:250 | NA     | NA       | Cf100  | NA      | NA     | NA | NA | NA |    |
| 34    | prior_BDQ       | -2       | table 2         | 22699  | CAR-13    | ERR4872264       | 2.2.1             | Beijing      | rai Asia out | M    | PTC-failure | due_to         | NEGATIVE | yes | pos | 31        | XDR                    | 1              | 5      | 8dq100 | Lsd600 | NA   | NA   | 2400      | Mfx400 | NA     | NA     | Ps4000  | Cs250   | NA     | NA       | NA     | NA      | NA     | NA | NA | NA |    |
| 35    | prior_BDQ       | -159     | only_follow-up  | 9196   | CAR-16    | ERR4872349       | 2.2.1             | Beijing      | rai Asia out | M    | PTC-failure | due_to         | NEGATIVE | yes | pos | 39        | XDR                    | 1              | 5      | 8dq100 | Lsd600 | NA   | NA   | 2400      | Mfx400 | NA     | NA     | Ps4000  | Cs250   | NA     | NA       | NA     | NA      | NA     | NA | NA | NA |    |
| 36    | prior_BDQ       | -22      | only_follow-up  | 17981  | CAR-4     | ERR4872306       | 4.2.1             | Ural         | not_Beijing  | F    | PTC-relapsa | lost           | NA       | yes | neg | 31        | XDR                    | NA             | 0      | 8dq100 | Lsd500 | NA   | NA   | NA        | NA     | NA     | NA     | Ps4000  | Cs250   | NA     | Imp500   | A      | NA      | NA     | NA | NA | NA |    |
| 37    | prior_BDQ       | -107     | table 2         | 19365  | CAR-31    | ERR4872286       | 4.2.1             | Ural         | not_Beijing  | M    | PTC-relapsa | failure        | NEGATIVE | yes | neg | 55        | XDR                    | NA             | 0      | 8dq100 | Lsd500 | NA   | NA   | 2400      | NA     | NA     | Cm1000 | NA      | Ps4000  | Cs250  | NA       | Imp500 | A       | NA     | NA | NA | NA |    |
| 38    | prior_BDQ       | -287     | only_follow-up  | 8423   | CAR-84    | ERR4872344       | 2.2.1             | Beijing      | rai Asia out | F    | PTC-failure | cured          | POSITIVE | yes | neg | 27        | XDR                    | NA             | 3      | 8dq100 | Lsd600 | NA   | NA   | 2400      | Lfx250 | NA     | NA     | NA      | Cs250   | NA     | Imp500   | A      | NA      | NA     | NA | NA | NA |    |
| 39    | prior_BDQ       | -236     | only_follow-up  | 345    | CAR-43    | ERR4872299       | 4.2.1             | Ural         | not_Beijing  | M    | PTC-failure | failure        | NEGATIVE | yes | neg | 37        | XDR                    | NA             | 4      | 8dq100 | Lsd600 | NA   | NA   | 2400      | Mfx400 | NA     | NA     | Ps4000  | Cs250   | Cf100  | Imp500   | A      | NA      | NA     | NA | NA | NA |    |
| 40    | prior_BDQ       | -340     | table 2         | 22388  | CAR-79    | ERR4872338       | 2.2.1             | Beijing      | issian W144  | M    | new_case    | cured          | POSITIVE | yes | neg | 48        | XDR                    | 1126           | 0      | 8dq100 | Lsd500 | NA   | NA   | 2400      | Mfx400 | NA     | NA     | NA      | Cs250   | NA     | NA       | NA     | NA      | NA     | NA | NA | NA |    |
| 41    | prior_BDQ       | -29      | follow-up       | 19304  | CAR-32    | ERR4872287       | 4.9               | H37R-like    | not_Beijing  | M    | new_case    | cured          | POSITIVE | yes | neg | 49        | MDR+                   | 1126           | 0      | 8dq100 | Lsd500 | NA   | NA   | 2400      | Mfx400 | NA     | NA     | NA      | Cs250   | NA     | NA       | NA     | NA      | NA     | NA | NA | NA |    |
| 42    | prior_BDQ       | -127     | table 2         | 8738   | CAR-89    | ERR4872349       | 2.2.1             | Beijing      | issian W144  | M    | PTC-failure | cured          | POSITIVE | yes | neg | 37        | XDR                    | 2              | 1      | 8dq100 | Lsd500 | NA   | NA   | 2400      | NA     | NA     | Cm1000 | NA      | NA      | Cs250  | NA       | Imp500 | A       | NA     | NA | NA | NA | NA |
| 43    | prior_BDQ       | -61      | follow-up       | 21776  | CAR-22    | ERR4872274       | 2.2.1             | Be           |              |      |             |                |          |     |     |           |                        |                |        |        |        |      |      |           |        |        |        |         |         |        |          |        |         |        |    |    |    |    |
